# Supplementary material for: High throughput extraction of plasma using a secondary flow-aided inertial microfluidic device
Source: Royal Society of Chemistry journal article supplement (doi:10.1039/c4ra06513a), 2014-07-18
Supplement: c4ra06513a2.pdf [file c4ra06513a2.pdf]

## Supplementary information

(1) Supplementary Fig. S1

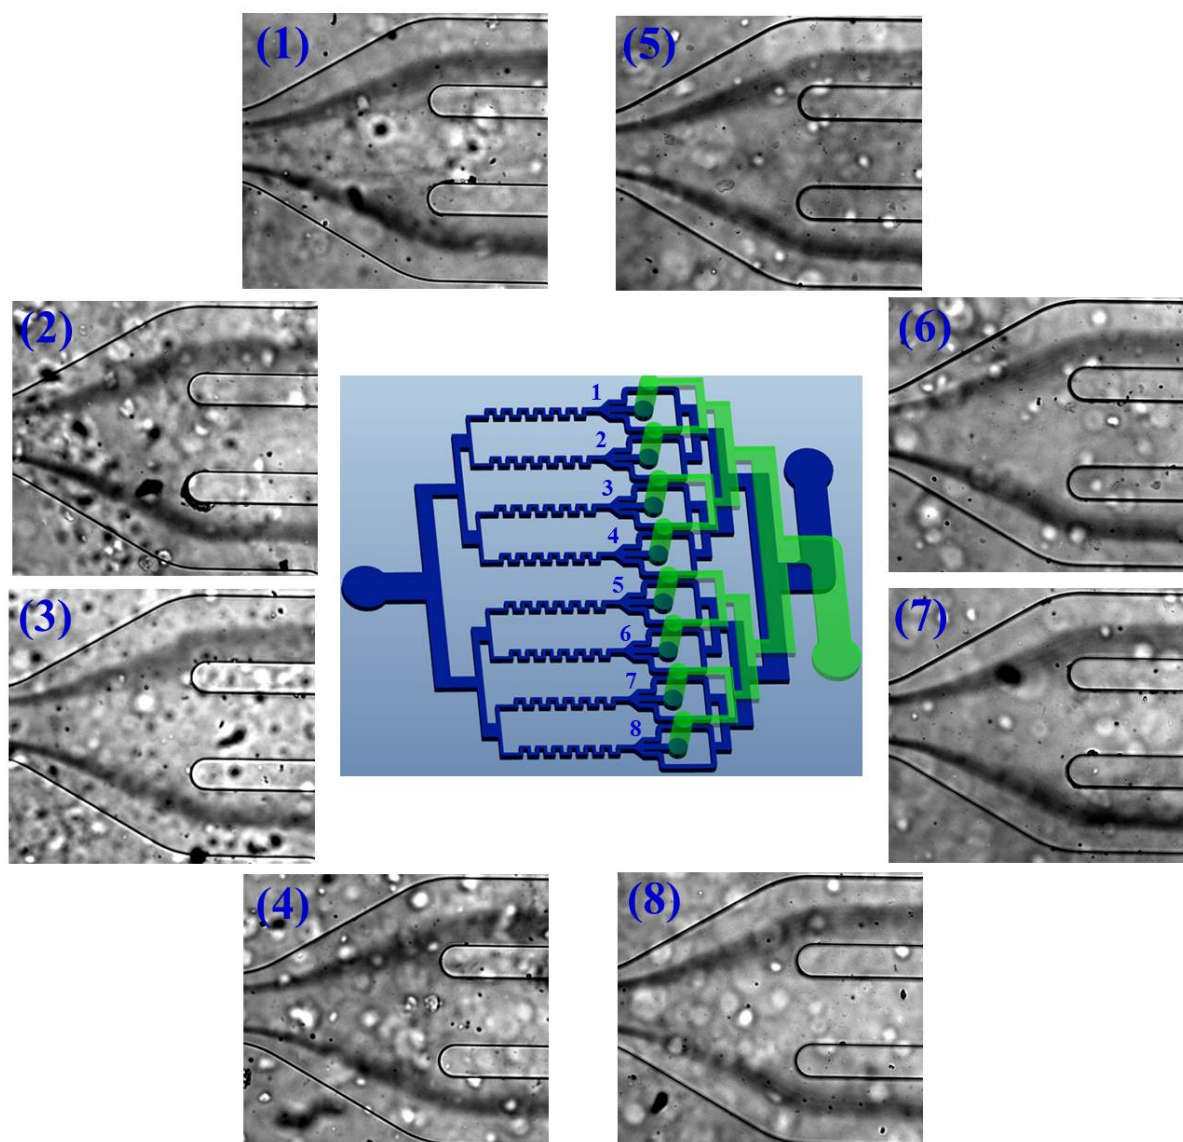

**Supplementary Fig. S1** Bright field images at each outlet bifurcation in the parallel device. The uniform streamline splitting and blood cells filtration at each outlet validate our parallelization design considerations.
